# Supplementary material for: COVID-19 vaccine confidence and its effect on vaccine uptake among people with hypertension or diabetes mellitus in Kilimanjaro region, Tanzania
Source: PubMed Central journal article supplement — Hum Vaccin Immunother. 2024 Sep 2;20(1):2396213. doi: 10.1080/21645515.2024.2396213 (PMC11370906; doi:10.1080/21645515.2024.2396213), 2024-09-02
Supplement: KHVI_A_2396213_SM1575.pdf [file KHVI_A_2396213_SM1575.pdf]

**Supplementary table: Covid-19 vaccine confidence in importance, safety, and effectiveness by participants characteristics (N=646)**

| <b>Variable</b>                     | <b>Participants (n)</b> | <b>Importance (%)</b> | <b>P value</b> | <b>Safety (%)</b> | <b>P value</b> | <b>Effectiveness (%)</b> | <b>P value</b> |
|-------------------------------------|-------------------------|-----------------------|----------------|-------------------|----------------|--------------------------|----------------|
| <b>Age (years)</b>                  |                         |                       | 0.002          |                   | 0.004          |                          | <0.001         |
| <50                                 | 100                     | 82 (82.0)             |                | 75 (75.0)         |                | 78 (78.0)                |                |
| 50-59                               | 181                     | 154 (85.1)            |                | 143 (79.0)        |                | 149 (82.3)               |                |
| 60-69                               | 170                     | 143 (84.1)            |                | 134 (78.8)        |                | 140 (82.4)               |                |
| 70+                                 | 195                     | 138 (70.8)            |                | 126 (64.2)        |                | 128 (65.6)               |                |
| <b>Sex</b>                          |                         |                       | 0.64           |                   | 0.46           |                          | 0.70           |
| Male                                | 140                     | 114 (81.43)           |                | 107 (76.4)        |                | 109 (77.9)               |                |
| Female                              | 506                     | 403 (79.6)            |                | 371 (73.3)        |                | 386 (76.3)               |                |
| <b>Education</b>                    |                         |                       | <0.001         |                   | <0.001         |                          | <0.001         |
| None                                | 81                      | 50 (61.7)             |                | 44 (54.3)         |                | 42 (51.9)                |                |
| Primary                             | 473                     | 387 (81.8)            |                | 355 (75.1)        |                | 374 (79.1)               |                |
| Education<br>Secondary and<br>above | 92                      | 80 (87.0)             |                | 79 (85.9)         |                | 79 (85.9)                |                |
| <b>District</b>                     |                         |                       | 0.06           |                   | 0.15           |                          | 0.06           |
| Moshi MC                            | 217                     | 167 (77.0)            |                | 157 (72.4)        |                | 160 (73.7)               |                |
| Moshi DC                            | 174                     | 134 (77.0)            |                | 122 (70.1)        |                | 127 (73.0)               |                |
| Mwanga MC                           | 255                     | 216 (84.7)            |                | 199 (78.0)        |                | 208 (81.6)               |                |
| <b>Marital status<sup>1</sup></b>   |                         |                       | 0.03           |                   | 0.01           |                          | 0.01           |
| In union                            | 364                     | 302 (83.0)            |                | 283 (77.8)        |                | 292 (80.2)               |                |
| Not in union                        | 282                     | 215 (76.2)            |                | 195 (69.2)        |                | 203 (72.0)               |                |
| <b>Have bank<br/>account</b>        |                         |                       | 0.02           |                   | <0.001         |                          | 0.04           |
| No                                  | 537                     | 421 (78.4)            |                | 382 (71.1)        |                | 403 (75.1)               |                |
| Yes                                 | 109                     | 96 (88.1)             |                | 96 (88.1)         |                | 92 (84.4)                |                |
| <b>Religion</b>                     |                         |                       | 0.69           |                   | 0.19           |                          | 0.60           |
| Muslim                              | 317                     | 256 (80.8)            |                | 235 (74.1)        |                | 245 (77.3)               |                |

|                                               |     |            |        |            |        |            |        |
|-----------------------------------------------|-----|------------|--------|------------|--------|------------|--------|
| Christian                                     | 320 | 253 (79.1) |        | 234 (73.1) |        | 242 (75.6) |        |
| Others                                        | 9   | 8 (88.9)   |        | 9 (100)    |        | 8 (88.9)   |        |
| <b>Covid-19 risk perception</b>               |     |            | 0.01   |            | 0.12   |            | 0.005  |
| Not at risk                                   | 394 | 303 (76.9) |        | 283 (71.8) |        | 287 (72.8) |        |
| At risk                                       | 252 | 214 (84.9) |        | 195 (77.4) |        | 208 (82.5) |        |
| <b>Ever infected with Covid-19 disease</b>    |     |            | 0.10   |            | 0.12   |            | 0.22   |
| No                                            | 612 | 486 (79.4) |        | 449 (73.4) |        | 466 (76.1) |        |
| Yes                                           | 34  | 31 (91.2)  |        | 29 (85.3)  |        | 29 (85.3)  |        |
| <b>COVID-19 vaccine knowledge<sup>2</sup></b> |     |            | <0.001 |            | <0.001 |            | <0.001 |
| Poor knowledge                                | 371 | 252 (67.9) |        | 225 (60.7) |        | 236 (63.6) |        |
| Good Knowledge                                | 275 | 265 (96.4) |        | 253 (92.0) |        | 259 (94.2) |        |

<sup>1</sup>In union is being married or cohabiting. Not in union includes being single/divorced/separated/widow/widower

<sup>2</sup>Details on how COVID-19 vaccine knowledge was measured have been published elsewhere.<sup>24</sup>
