# Supplementary material for: COVID-19 vaccine confidence and its effect on vaccine uptake among people with hypertension or diabetes mellitus in Kilimanjaro region, Tanzania
Source: PubMed Central journal article supplement — Hum Vaccin Immunother. 2024 Sep 2;20(1):2396213. doi: 10.1080/21645515.2024.2396213 (PMC11370906; doi:10.1080/21645515.2024.2396213), 2024-09-02
Supplement: KHVI_A_2396213_SM1580.pdf [file KHVI_A_2396213_SM1580.pdf]

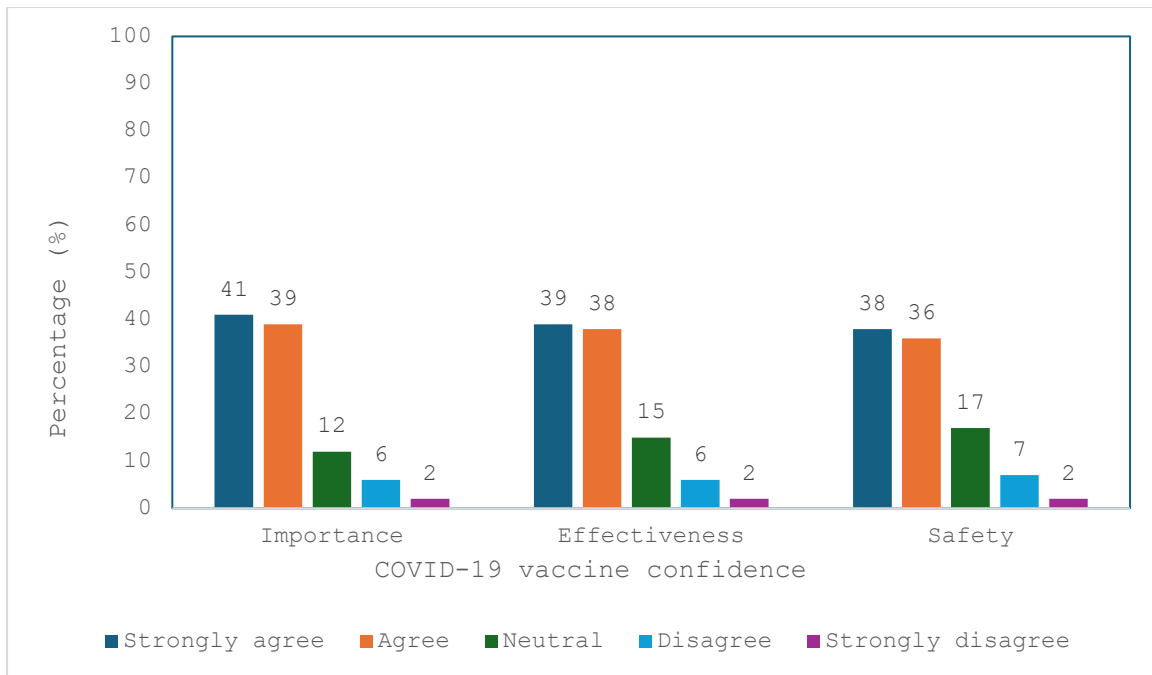

**Supplementary figure: COVID-19 vaccine confidence (categories given in the original ordinal scale) among individuals with hypertension or diabetes mellitus in Kilimanjaro Region, Tanzania**
